# Supplementary material
Source: publisher site journal article supplement (https://www.dovepress.com/article/276286)
Supplement: Supplementary file 1 [file get_supplementary_file.php]

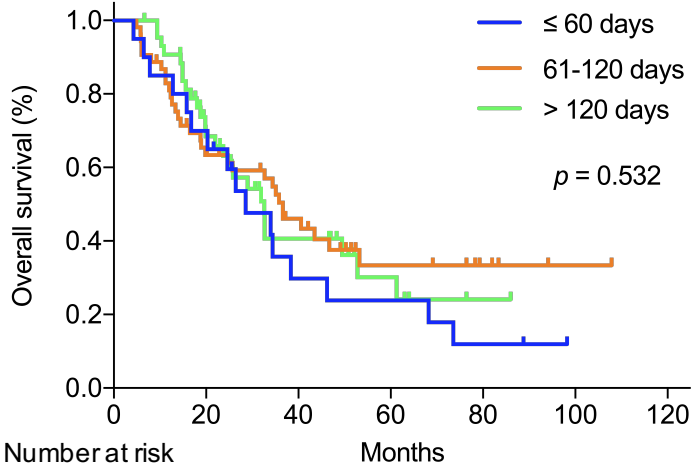

|             | 0  | 20 | 40 | 60 | 80 | 100 | 120 |
|-------------|----|----|----|----|----|-----|-----|
| ≤ 60 days   | 20 | 15 | 20 | 5  | 3  | 1   | 0   |
| 60-120 days | 53 | 33 | 18 | 9  | 5  | 2   | 0   |
| > 120 days  | 44 | 27 | 14 | 6  | 2  | 0   | 0   |

Supplementary Figure 1 Overall survival of patients according to different intervals of systematic CT initiation to nasopharyngeal-neck RT initiation. CT, Chemotherapy; RT, Radiotherapy.
